# Supplementary material
Source: PubMed Central journal article supplement (PMC7076212)
Supplement: supp_RA119.011646_156746_2_supp_464338_q4lrf4.pdf [file supp_RA119.011646_156746_2_supp_464338_q4lrf4.pdf]

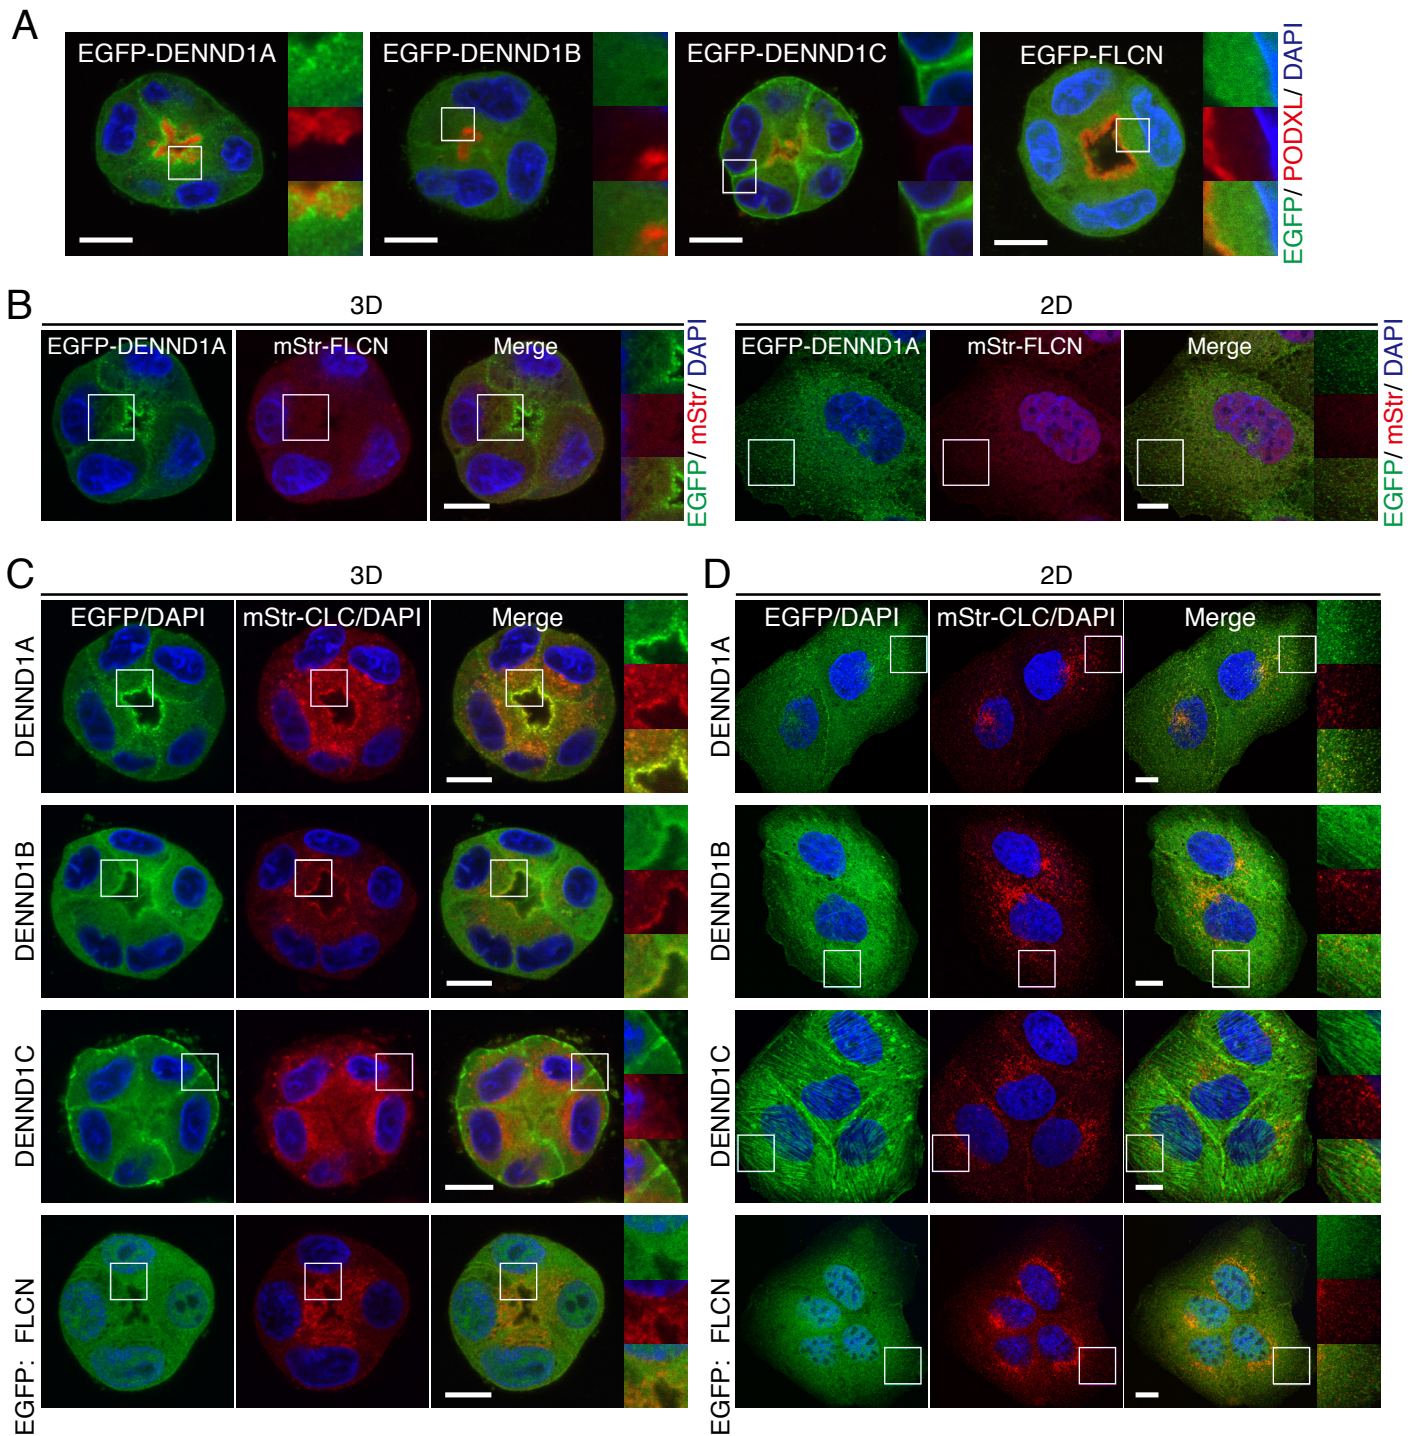

**SUPPLEMENTAL FIGURE S1. Localization of DENND1 family proteins and FLCN in 2D and 3D MDCK II cell cultures.** *A*, parental cells stably expressing EGFP-DENND1A, -DENND1B, -DENND1C, or -FLCN (green) were plated on Matrigel and fixed at 42 h after plating. The cells were stained for PODXL (red) and DAPI (blue). *B*, parental cells stably expressing EGFP-DENND1A (green) and mStr-FLCN (red) were plated on Matrigel and fixed at 42 h after plating (3D) or plated on a glass-bottom dish and fixed at 24 h after plating (2D). The cells were stained for DAPI (blue). *C* and *D*, parental cells stably expressing each EGFP-tagged protein (EGFP-DENND1A, EGFP-DENND1B, EGFP-DENND1C, or EGFP-FLCN: shown in green) and mStr-clathrin light chain (CLC) (red) were plated on Matrigel and fixed at 42 h after plating (*C*), or plated on glass-bottom dishes and fixed at 24 h after plating (*D*). The cells were stained for DAPI (blue). Scale bars, 10  $\mu$ m.

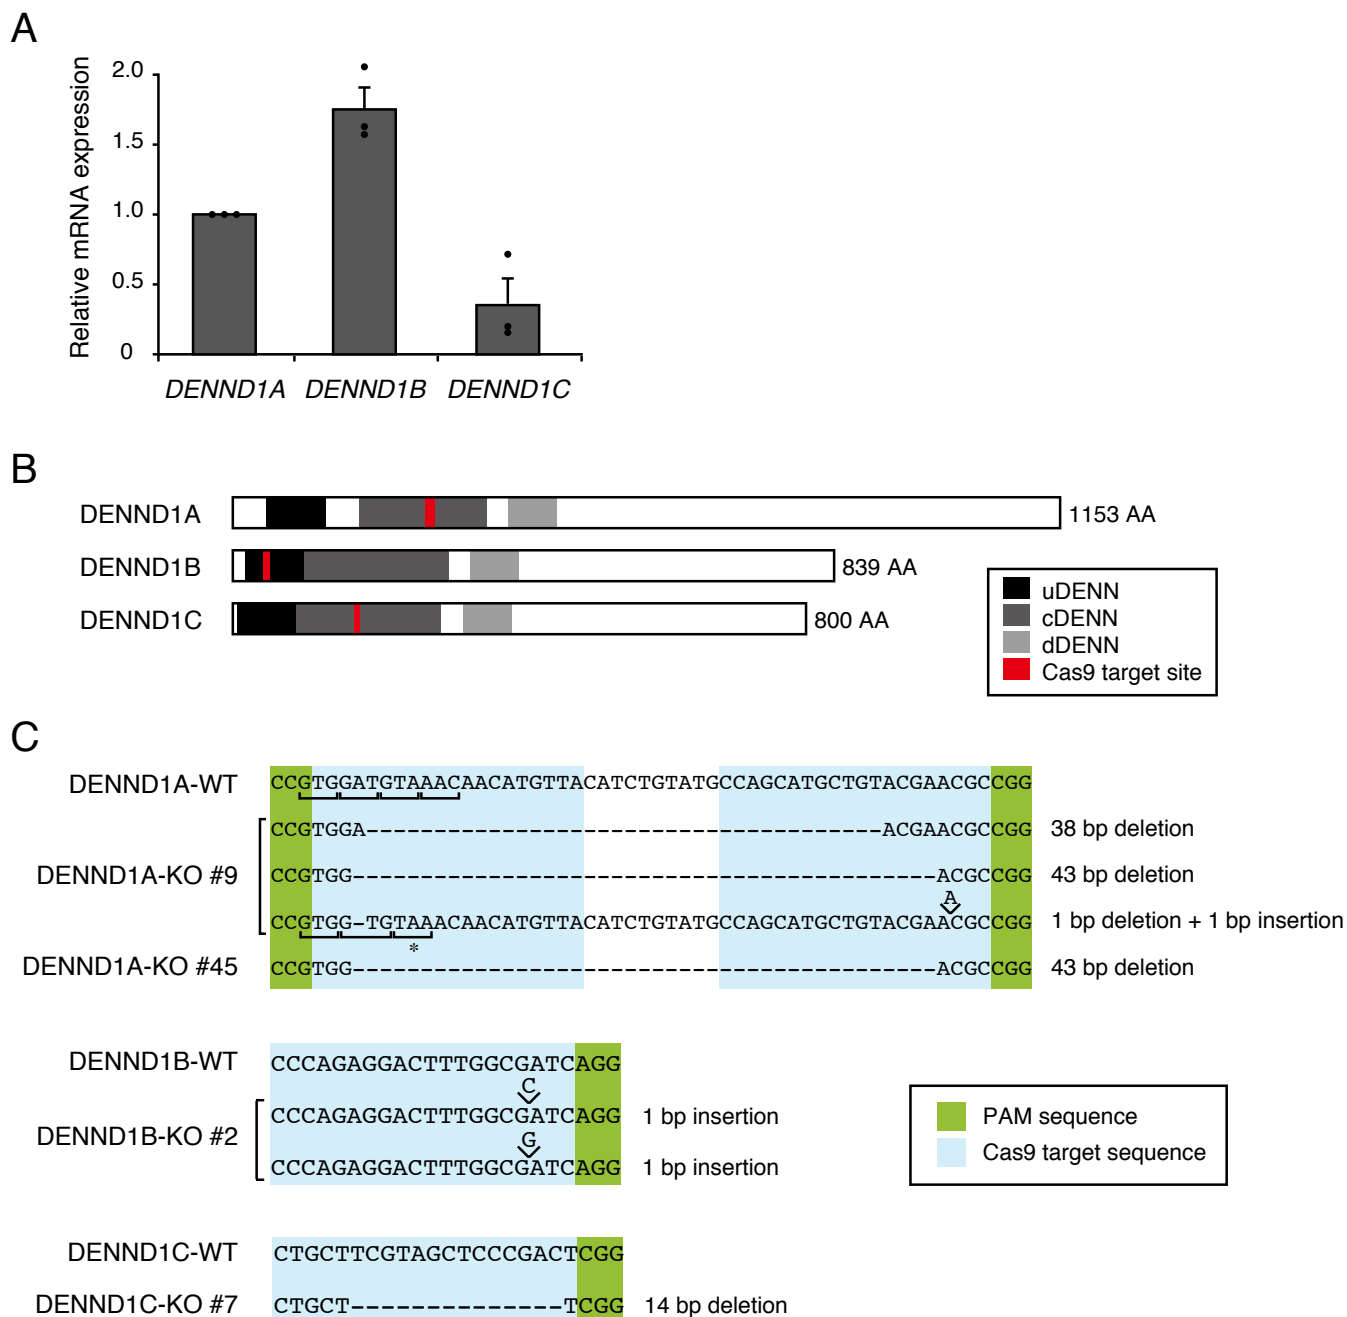

**SUPPLEMENTAL FIGURE S2. Genomic information about DENND1A-KO, DENND1B-KO, and DENND1C-KO cells.** *A*, relative mRNA levels of DENND1 family proteins in MDCK II cells as revealed using real time PCR analysis. The graph shows the means of each mRNA levels normalized to that of *DENND1A* and the SEM of three independent experiments. *B*, schematic representation of canine DENND1 family proteins. The Cas9 target sites (indicated by red lines) are located within the DENN domain. The NCBI accession numbers that were used were as follows: DENND1A, XP\_022279564.1; DENND1B, XP\_022276545.1; and DENND1C, XP\_013977397.1. *C*, genomic mutations in DENND1A-KO (#9 and #45), DENND1B-KO (#2), and DENND1C-KO (#7) cells. Genomic sequences around the Cas9 target sites of these cells are shown. The brackets below the sequence show the reading frames of the *DENND1A* gene. Although one out of three types of indels in the DENND1A-KO cells (#9) did not induce a frame shift in the DENND1A sequence (1 bp deletion + 1 bp insertion), a stop codon mutation (shown by the asterisk) occurred downstream of the Cas9 target site. PAM, protospacer adjacent motif.

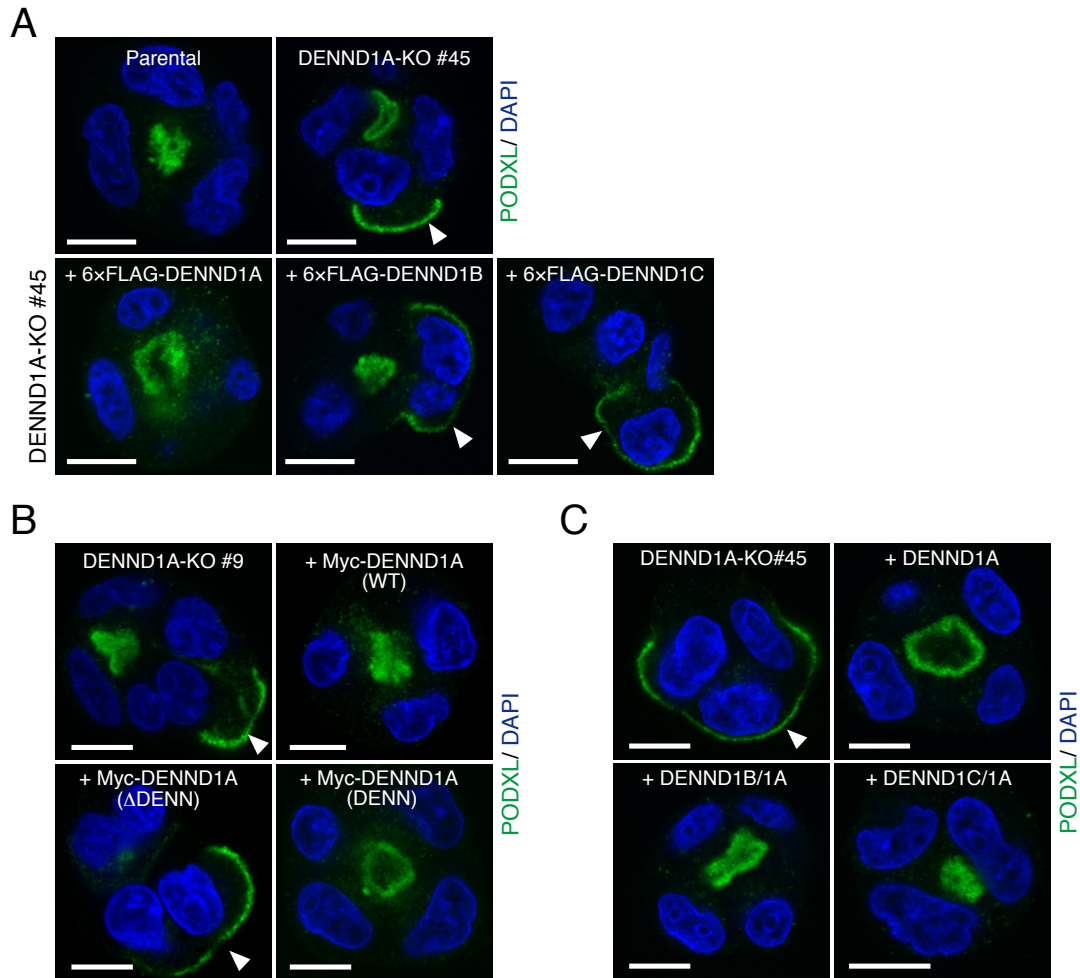

**SUPPLEMENTAL FIGURE S3. Localization of PODXL in DENND1A-KO and its rescued cells.** *A*, parental, DENND1A-KO (#45), and its rescued cells (+6×FLAG-tagged DENND1A, DENND1B, or DENND1C) were plated on Matrigel and fixed at 42 h after plating. The cells were stained for PODXL (*green*) and DAPI (*blue*). The arrowheads show PODXL localizing on the outer membrane (*see also* Fig. 3). *B*, DENND1A-KO (#9) and its rescued cells (+Myc-DENND1A [WT, ΔDENN or DENN]) were plated on Matrigel and fixed at 42 h after plating. The cells were stained for PODXL (*green*) and DAPI (*blue*). The arrowheads show PODXL localizing on the outer membrane (*see also* Fig. 4). *C*, DENND1A-KO (#45) and its rescued cells (+6×FLAG- tagged DENND1A, DENND1B/1A, or DENND1C/1A) were plated on Matrigel and fixed at 42 h after plating. The cells were stained for PODXL (*green*) and DAPI (*blue*). The arrowhead shows PODXL localizing on the outer membrane (*see also* Fig. 4). Scale bars, 10 μm.

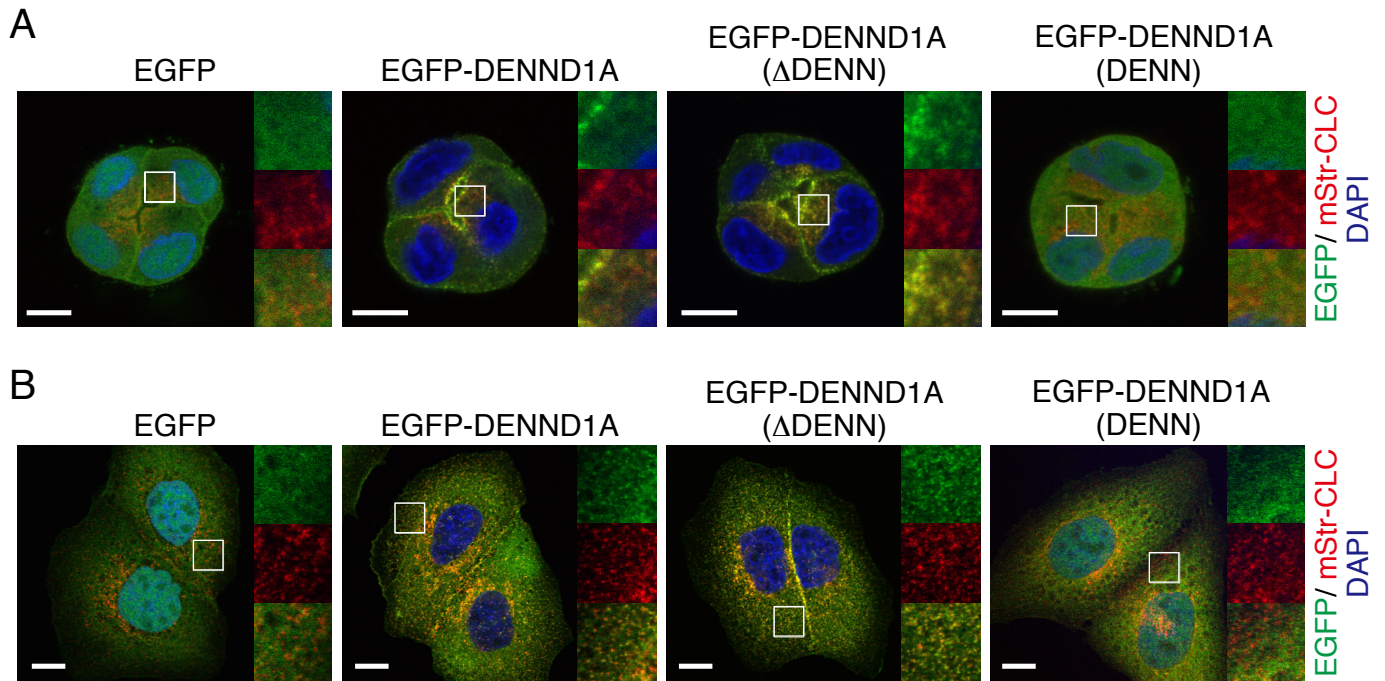

**SUPPLEMENTAL FIGURE S4. Localization of the DENND1A- $\Delta$ DENN and -DENN mutants in 2D and 3D MDCK II cell cultures.** *A* and *B*, localization of DENND1A and its mutants ( $\Delta$ DENN and DENN) in 3D cysts (*A*) and 2D cultured cells (*B*). DENND1A-KO (#9) cells stably expressing each EGFP-tagged protein (EGFP alone, EGFP-DENND1A, EGFP-DENND1A- $\Delta$ DENN, or EGFP-DENND1A-DENN: shown in *green*) and mStr-tagged clathrin light-chain (CLC) (*red*) were plated on Matrigel and fixed at 42 h after plating (*A*), or plated on glass-bottom dishes and fixed at 24 h after plating (*B*). The cells were stained with DAPI (*blue*). Scale bars, 10  $\mu$ m.

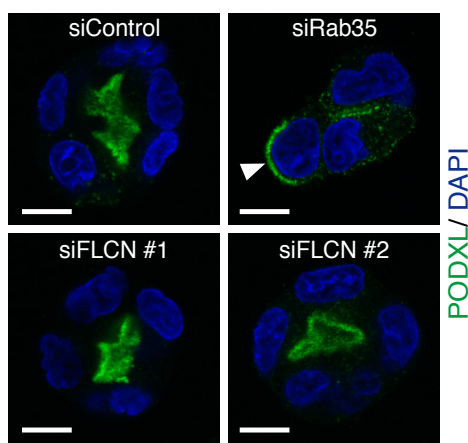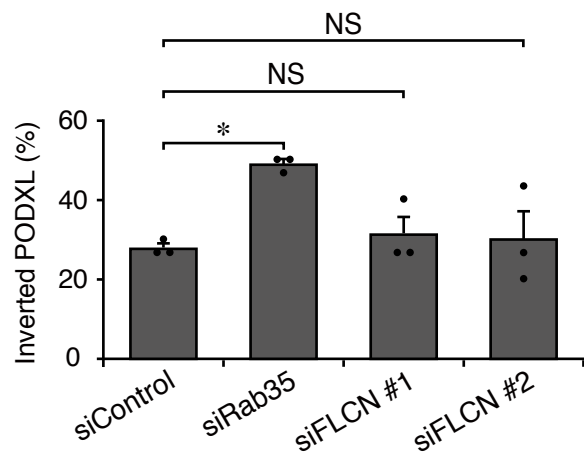

**SUPPLEMENTAL FIGURE S5. FLCN is not involved in PODXL trafficking in 3D cysts.** Quantification of the percentage of inverted 3D cysts of FLCN-KD MDCK II cells. Parental cells that had been treated with control siRNA, siRNA against Rab35 (*siRab35*), or FLCN (#1/#2) (*siFLCN*) were plated on Matrigel and fixed at 42 h after plating, followed by counting of the inverted cysts (30 cysts per condition). Scale bars, 10  $\mu$ m. The graph shows the means and SEM of three independent experiments. \*,  $p < 0.05$ ; NS, not significant (Dunnett's test).

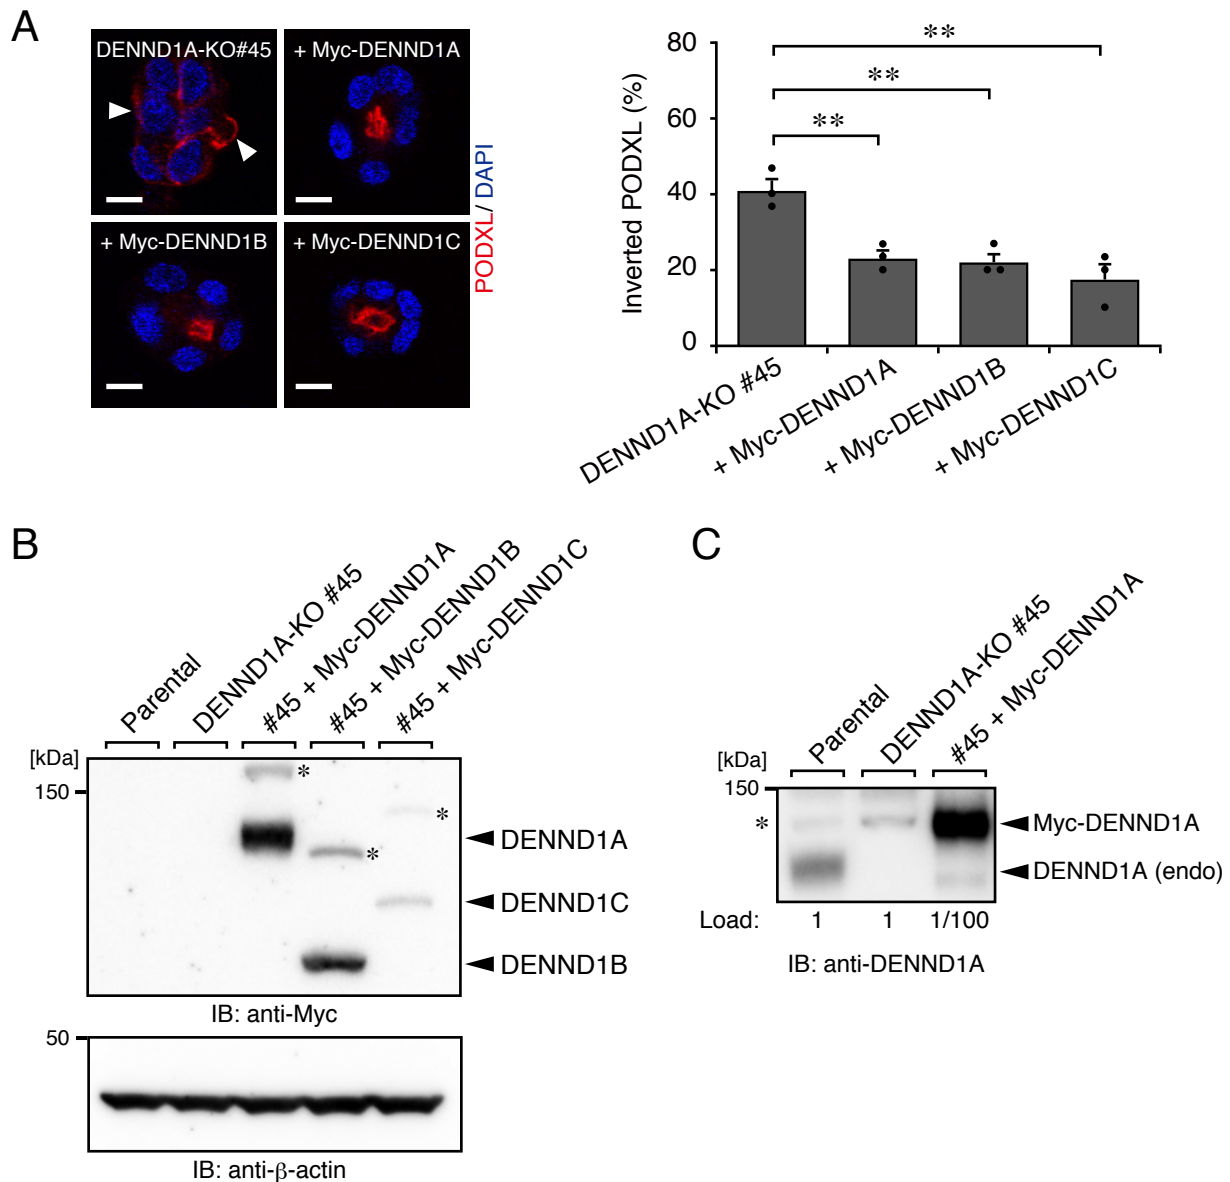

**SUPPLEMENTAL FIGURE S6. Forced overexpression of DENND1B or DENND1C in DENND1A-KO cells can rescue the DENND1A-KO phenotype.** *A*, DENND1A-KO (#45), and its rescued cells (+Myc-tagged DENND1A, DENND1B, or DENND1C; overexpression) were plated on Matrigel and fixed at 42 h after plating. The cells were stained for PODXL (red) and DAPI (blue), followed by counting of the inverted PODXL (30 cysts per condition). Scale bars, 10  $\mu$ m. The graph shows the means and SEM of three independent experiments. \*\*,  $p < 0.01$  (Dunnett's test). *B*, lysates of the cells used in *A* and parental cells were analyzed by immunoblotting with anti-Myc and anti- $\beta$ -actin antibodies. The additional higher bands (asterisks) presumably result from post-translational modifications or an SDS-insensitive dimer. *C*, lysates of parental, DENND1A-KO (#45), and its rescued cells (+Myc-DENND1A) used in *B* were analyzed by immunoblotting with anti-DENND1A antibody. The same amount of the lysates of the parental and DENND1A-KO cells was loaded in *B* and *C*. The 100-fold diluted sample of the rescued cells (+Myc-DENND1A) was loaded in *C*. As judged from the band intensity, the amount of Myc-DENND1A/B/C was estimated to be more than 30 times greater than that of endogenous (*endo*) DENND1A. The asterisk indicates a non-specific band of the primary antibody.

**Table S1. A list of the oligonucleotides used in this study**

| Oligonucleotides                             | Sequence                       | Source      |
|----------------------------------------------|--------------------------------|-------------|
| <b>siRNAs</b>                                |                                |             |
| Control siRNA                                | CGUACGCGAAUACUUCGA             | Nippon Gene |
| human <i>Rab35</i> siRNA                     | AGCGGUGGCUUCACGAAAU            | Nippon Gene |
| canine <i>FLCN</i> siRNA #1                  | ACACGGCCUUCACACCAUU            | Nippon Gene |
| canine <i>FLCN</i> siRNA #2                  | GCCACACUUUCUUCAUCAA            | Nippon Gene |
| <b>Real-time PCR primers</b>                 |                                |             |
| <i>DENNDIA</i> -qPCR-fw                      | GGTGAAGGTTTCAGTGACG            | eurofins    |
| <i>DENNDIA</i> -qPCR-rv                      | CAGTCTTCATAGCCGGGT             | eurofins    |
| <i>DENNDIB</i> -qPCR-fw                      | AAACGAAGATCCGGTGGT             | eurofins    |
| <i>DENNDIB</i> -qPCR-rv                      | TTCAATGTCTGTCTAGTACAAAGGT      | eurofins    |
| <i>DENNDIC</i> -qPCR-fw                      | CCCTGAGTCCCATCTCCTAA           | eurofins    |
| <i>DENNDIC</i> -qPCR-rv                      | TGGGAGGTCCGGGTAATA             | eurofins    |
| <b>sgRNA primers</b>                         |                                |             |
| <i>DENNDIA</i> -sgRNA-1-fw                   | CACCGCCAGCATGCTGTACGAACGC      | eurofins    |
| <i>DENNDIA</i> -sgRNA-1-rv                   | AAACGCGTTTCGTACAGCATGCTGGC     | eurofins    |
| <i>DENNDIA</i> -sgRNA-2-fw                   | CACCGTAACATGTTGTTTACATCCA      | eurofins    |
| <i>DENNDIA</i> -sgRNA-2-rv                   | AAACTGGATGTAAACAACATGTTAC      | eurofins    |
| <i>DENNDIB</i> -sgRNA-fw                     | CACCGCCCAGAGGACTTTGGCGATC      | eurofins    |
| <i>DENNDIB</i> -sgRNA-rv                     | AAACGATCGCCAAAGTCCTCTGGGC      | eurofins    |
| <i>DENNDIC</i> -sgRNA-fw                     | CACCGCTGCTTCGTAGCTCCCGACT      | eurofins    |
| <i>DENNDIC</i> -sgRNA-rv                     | AAACAGTCGGGAGCTACGAAGCAGC      | eurofins    |
| <b>Genomic PCR primers</b>                   |                                |             |
| <i>DENNDIA</i> -genome-fw                    | TTATAATAAGAACAACAAAATAAGCCACT  | eurofins    |
| <i>DENNDIA</i> -genome-rv                    | ACTGTAAAGAAACACGAATAATTAATGAAA | eurofins    |
| <i>DENNDIB</i> -genome-fw                    | TGAGTTGTGAAAAGAAATAATGAGTTTTA  | eurofins    |
| <i>DENNDIB</i> -genome-rv                    | AATATACATGTAAAGCAATTCAGACATCAC | eurofins    |
| <i>DENNDIC</i> -genome-fw                    | AGAATCCCCAGGCCTGACCTAAGACCCTCA | eurofins    |
| <i>DENNDIC</i> -genome-rv                    | CCTCCTCCTAGCGATGCAGCTAGGATTTGC | eurofins    |
| <b>Primers used for plasmid construction</b> |                                |             |
| D1A-ΔDENN (for 1B/1A)-fw                     | AAGCTTAATTCCGGTGAAGGTTTCAG     | eurofins    |

|                          |                            |                         |
|--------------------------|----------------------------|-------------------------|
| D1A-ΔDENN (for 1C/1A)-fw | CTCGAGCTTCTCAATTCCGGTGAAGG | eurofins                |
| DENND1A-rv               | TCACTCAAAGGTCTCCCACT       | Hokkaido System Science |
| DENND1B-fw               | AGATCTATGGACTGCAGGACCAAGGC | Hokkaido System Science |
| DENND1B-DENN-rv          | ACCCCTTCCTGCATTAAGCTTTGCCA | eurofins                |
| DENND1C-fw               | AGATCTATGGAATCCAGAGCTGAAGG | Hokkaido System Science |
| DENND1C-DENN-rv          | TTGTTGAGCTTCTCGAGCCGGGCTTC | eurofins                |

---

qPCR, quantitative PCR; sgRNA, single guide RNA; fw, forward; rv, reverse.
